## 1    **ABSTRACT**

2    By event-related potentials (ERP) during a counting Stroop task it was shown that the elderly with  
3    excess in theta activity in their electroencephalogram (EEG) are at risk of cognitive decline and  
4    have a higher neuronal activity during stimulus categorization than the elderly with a normal  
5    EEG. It was suggested that this increased neuronal activity could have a compensatory function.  
6    However, the quantification of energy associated with the enhanced neuronal activity was not  
7    investigated in this group. By wavelet analysis, we measured total and relative energy in ERP  
8    during the execution of a counting Stroop task in two groups of elderly: one with excess in theta  
9    activity (Theta-EEG, n = 23) and the other with normal EEG (Normal-EEG, n = 23). In delta,  
10    theta, and alpha bands, the Theta-EEG group used a higher amount of total energy as compared  
11    to the Normal-EEG group for both types of stimuli, interference and no interference. In theta and  
12    alpha bands, the total energy was higher in the Theta-EEG group, specifically in the window of  
13    258-516 ms, coinciding with stimulus categorization. Given that no major behavioral differences  
14    were observed between EEG groups, we suggest that a higher energy in delta, theta, and alpha  
15    bands is one of the neurobiological mechanisms that allows the Theta-EEG group to cope with  
16    the cognitive demands of the task. However, this increased energy might not be an effective  
17    mechanism in the long term as it could promote a metabolic and cellular dysregulation that would  
18    trigger the transition to cognitive impairment.

## 19    **SIGNIFICANCE STATEMENT**

20            By using wavelet transform analysis we report that the elderly with excess in theta activity  
21    show a higher energy in delta, theta, and alpha bands during the categorization of stimuli in a  
22    counting Stroop task. Our findings imply that this increase neuronal activity might be related to a  
23    dysregulated energy metabolism in the elderly with theta excess that could explain the progress  
24    to cognitive impairment in this group. The analysis of energy by wavelet transform in data  
25    obtained by ERP complements other techniques that evaluate the risk of cognitive impairment.

## 26    **INTRODUCTION**

1 Healthy aging is accompanied by a natural detriment of physical and cognitive abilities (Román  
2 Lapuente and Sánchez Navarro, 1998). In particular, inhibitory control (Thomas et al., 2010; Rey-  
3 Mermet and Gade, 2018) and attention (Thomas et al., 2010; Diamond, 2020) are importantly  
4 affected. Changes in brain electrical activity, which can be measured noninvasively by the EEG,  
5 are tightly related to the aforementioned cognitive processes (Buzsáki, 2006; Lopes da Silva,  
6 2011). Some authors have proposed that changes in the EEG of the elderly, obtained under resting  
7 conditions, are not only the result of normal aging but can contain signs of undergoing subclinical  
8 pathologic processes (Chang et al., 2011). Moreover, excess in delta and theta band frequencies  
9 of resting EEG from healthy elderly, compared to a normative base according to age, is an  
10 excellent predictor of cognitive detriment in the following seven years (Prichep et al., 2006; van  
11 der Hiele et al., 2008). Recently we showed that healthy elderly with an excess of theta EEG  
12 activity are not only at risk of developing cognitive decline but already have impairments in  
13 inhibitory control processing at the electrophysiological level (Sánchez-Moguel et al., 2018).

14 Stroop tasks have been used during event-related potentials (ERP) and functional magnetic  
15 resonance imaging (fMRI) to study the decrease in the efficiency of inhibitory processing during  
16 healthy and pathological aging (West and Alain, 2000; Amieva, 2004; Kaufmann et al., 2008;  
17 Ramos-Goicoa et al., 2016; Sánchez-Moguel et al., 2018). An over-recruitment of neuronal  
18 activity during aging was observed using fMRI during the execution of Stroop tasks; this  
19 enhanced neuronal activity is proposed to have a compensatory function (Cabeza, 2002; Milham  
20 et al., 2002; Cabeza et al., 2004; Langenecker et al., 2004; Zysset et al., 2007; Mathis et al., 2009).  
21 Furthermore, fMRI studies showed higher brain activity in older people with mild cognitive  
22 impairment (MCI) compared to healthy elderly (Kaufmann et al., 2008).

23 In our earlier work, we proposed that the elderly with excess in theta EEG activity have an  
24 increased neuronal activity in ERP during a counting Stroop task (Sánchez-Moguel et al., 2018).  
25 We also suggested that the higher brain activity in ERP during a counting Stroop task was related  
26 to the categorization of stimuli, which would play a compensatory role. A higher neuronal activity  
27 is related to more energy; however, we have not quantified the energy associated with any

1 cognitive process in the elderly with excess in theta activity. As the elderly with excess in theta  
2 activity are probably in a previous stage of MCI, we hypothesize that they might already be  
3 having a dysregulation in brain energy, which is a hallmark of neurodegenerative diseases (Mattson  
4 and Arumugam, 2018).

5 Wavelet transform (WT) can help us to know the amount of energy used during the execution  
6 of Stroop tasks. The main advantage of wavelet analysis over Fourier analysis is the optimal time-  
7 frequency resolution, then, we can follow the brain frequency dynamics over time (Rosso et al.,  
8 2006). The wavelet analysis allows us to have a standard frequency decomposition of EEG signals  
9 over time (Goupillaud et al., 1984; Rosso et al., 2005, 2006). This is a desirable property, because  
10 we can track the frequency changes of the EEG signal over time and detect at which time point  
11 of the Stroop task the maximum amount of energy occurs.

12 The general objective of this study was to explore, using WT, if there were differences in the  
13 amount of energy in ERP during the performance of a counting Stroop task between a group of  
14 elderly with an excess of theta activity in their EEG and a group of elderly with normal EEG. The  
15 specific objective was to evaluate the amount of energy between EEG groups for each of the  
16 frequency bands (i.e., delta, theta, alpha, beta, and gamma) across different time windows of the  
17 ERP. We expected to find higher energy in the group with theta excess, specifically in the time  
18 window associated with categorization of stimuli.

## 19 **MATERIALS AND METHODS**

### 20 **Participants**

21 Forty-six healthy older adults aged over 60 years were recruited to participate in the study (26  
22 females). The inclusion criteria were to be right-handed, to have more than nine years of  
23 schooling, to have an average level of intelligence (Wechsler Intelligence Scale for adults 90-190,  
24 (Wechsler, 2003)), and to not have any psychiatric disorder according to their age (NEUROPSI,  
25 (Ostrosky-Solís et al., 1999)); Q-LES-Q questionnaire, > 70%, (Endicott et al., 1993); Mini-  
26 Mental State Examination, > 27, (Reisberg et al., 1982, 2008); Global Deterioration Scale, 1-2

1 (Reisberg et al., 1982, 2008); Alcohol Use Disorders Identification Test, < 5 (Babor et al., 2001);  
2 Beck Depression Inventory, < 4 (Beck et al., 1961); Geriatric Depression Scale, < 5 (Yesavage  
3 et al., 1982). Furthermore, subjects had no signs of chronic diseases such as diabetes or  
4 hypercholesterolemia. The subjects were classified into two groups according to the  
5 characteristics of their EEG. Subjects in the Normal-EEG group presented normal EEGs, from  
6 both the quantitative and qualitative points of view, and subjects in the Theta-EEG group  
7 presented an excess of theta activity for their age in at least one electrode; further described below.  
8 The project was approved by the bioethics committee of the Neurobiology Institute of the  
9 National Autonomous University of Mexico (UNAM). ERP analyses of the participants were  
10 published by Sánchez-Moguel et al. (2018) and are further analyzed here using wavelets.

## 11 **EEG analysis**

12 Based on the next analysis, participants were classified as with a normal EEG (Normal-EEG  
13 group) or with excess in the theta band (Theta-EEG group); 23 subjects made up each group (13  
14 females in each group).

15 The EEG from 19 tin electrodes (10-20 International System, ElectroCap™, International  
16 Inc.; Eaton, Ohio) referenced to linked ear lobes was recorded from each subject in the resting  
17 condition with eyes closed using a MEDICID™ IV system (Neuronic Mexicana, S.A.; Mexico)  
18 and Track Walker™ v5.0 data system for 15 min. The EEG was digitized using the MEDICID  
19 IV System (Neuronic A.C.) with a sampling rate of 200 Hz using a band-pass filter of 0.5 – 50  
20 Hz, and the impedance was kept below 5 kΩ. Twenty-four artifact-free segments of 2.56 s each  
21 were selected, and the quantitative EEG analysis was performed offline using the fast Fourier  
22 transform to obtain the power spectrum every 0.39 Hz; also the geometric power correction  
23 (Hernández et al., 1994) was applied, and absolute (AP) and relative power (RP) in each of the  
24 four classic frequency bands were obtained: Delta (1.5 - 3.5 Hz), theta (3.6 - 7.5 Hz), alpha (7.6 -  
25 12.5 Hz), and beta (12.6 - 19 Hz). These frequency ranges were the same as those used for the  
26 normative database (Valdés et al., 1990) provided by MEDICID IV. Z-values were obtained for

1 AP and RP, comparing subject's values with values of the normative database [ $Z = (x - \mu) / \sigma$ ,  
2 where  $\mu$  and  $\sigma$  are the mean value and the standard deviation of the normative sample of the same  
3 age as the subject, respectively]; Z-values  $> 1.96$  were considered abnormal ( $p < 0.05$ ).

#### 4 **Counting Stroop task**

5 In the counting Stroop task, subjects are asked to answer how many words are presented in a slide,  
6 regardless of the meaning of the word itself (Bush et al., 2006). Subjects increase their response  
7 times and tend to make more mistakes when the meaning of the word does not match the number  
8 of times that the word appears; this phenomenon is known as the Stroop or interference effect  
9 (MacLeod, 1991).

#### 10 **Behavioral task**

11 Series of one, two, three, or four words that denote numbers (“one,” “two,” “three,”  
12 “four”) were presented in the center of a 17-inch computer screen. Time presentation of the  
13 stimuli was 500 ms, and the interstimulus interval was 1,500 ms. An incongruent condition, herein  
14 referred as Interference stimulus, consisted of a trial where the number of presented words did  
15 not correspond with the meaning of the word. The congruent condition, further referred as No  
16 Interference stimulus, consisted of a trial in which the number of presented words and the meaning  
17 of the word that was presented matched. A total of 120 Interference and 120 No Interference  
18 stimuli were randomly presented.

19 Subjects were asked to indicate the number of times that the word appeared in each trial,  
20 using a response pad that they held in their hands. One-half of the participants used their left  
21 thumbs to answer “one” or “two” and their right thumbs to indicate “three” or “four”; the other  
22 half of the participants used their opposite hand to counterbalance the motor responses. The  
23 participants were asked to answer as quickly and accurately as possible. We ensured that the  
24 participants understood the instructions by presenting a brief practice task before the experimental  
25 session.

## 1 **ERP acquisition and analysis**

2 The EEGs were recorded with 32 Ag/AgCl electrodes mounted on an elastic cap (Electrocap)  
3 while the participant performed the counting Stroop task, using NeuroScan SynAmps amplifiers  
4 (Compumedics NeuroScan) and the Scan 4.5 software (Compumedics NeuroScan). Electrodes  
5 were referenced to the right earlobe (A2), and the electrical signal was collected from the left  
6 earlobe (A1) as an independent channel. Recordings were re-referenced offline in two ways: (a)  
7 to the averaged earlobes, as was usually performed in previous studies, and (b) to the average  
8 reference. The EEG was digitized with a sampling rate of 500 Hz using a band pass filter of  
9 0.01 to 100 Hz. Impedances were kept below 5 k $\Omega$ . An electrooculogram was recorded using a  
10 supraorbital electrode and an electrode placed on the outer canthus of the left eye.

11 ERP were obtained for each subject and experimental condition (i.e., No Interference  
12 and Interference). Epochs of 1,500 ms were obtained for each trial that consisted of 200-ms pre-  
13 stimulus and 1,300-ms post-stimulus intervals. An eye movement correction algorithm (Gratton  
14 et al., 1983) was applied to remove blinks and vertical ocular-movement artifacts. Low pass  
15 filtering for 50 Hz and a 6-dB slope was performed offline. A baseline correction was  
16 performed using the 200-ms pre-stimulus time window, and a linear detrend correction was  
17 performed on the whole epoch. Epochs with voltage changes exceeding  $\pm 80$   $\mu$ V were  
18 automatically rejected from the final average. The epochs were visually inspected, and those  
19 with artifacts were also rejected. Averaged waveforms for each subject and each stimulus type  
20 included only those trials that corresponded to correct responses.

## 21 **Wavelet transform and wavelet-based measures**

22 The ERPs were next subjected to a wavelet analysis. Unlike Fourier analysis, in which the sine  
23 and cosine functions are used, the wavelet transform is based on functions that are vanishing  
24 oscillating functions (Rosso et al., 2006). Within the wavelet multiresolution decomposition  
25 framework, a wavelet family  $\psi_{a,b}$  is a set of elemental functions generated by scaling and  
26 translating a unique admissible mother wavelet  $\psi(t)$ :

1 
$$\psi_{a,b} = |a|^{-\frac{1}{2}} \psi\left(\frac{t-b}{a}\right) \quad (1)$$

2 where  $a, b \in \mathbb{R}$ ,  $a \neq 0$  are the scale and translation parameter, respectively, and  $t$  is the time (Rosso  
3 et al., 2006). In this paper we use the Daubechies 2 as a mother wavelet.

4 The continuous wavelet transform (CWT) of a signal  $S(t) \in L^2(\mathbb{R})$  (the space of real square  
5 summable functions) is defined as the correlation between the signal  $S(t)$  with the family wavelet  
6  $\psi_{a,b}$  for each  $a$  and  $b$ :

7 
$$\langle S, \psi_{a,b} \rangle = |a|^{\frac{1}{2}} \int_{-\infty}^{\infty} S(t) \psi^*\left(\frac{t-b}{a}\right) dt \quad (2)$$

8 where  $*$  means complex conjugation. In principle, the CWT gives a highly redundant  
9 representation of the signal because it produces an infinite number of coefficients (Rosso et al.,  
10 2006). A nonredundant and efficient representation is given by the discrete wavelet transform  
11 (DWT), which also ensures complete signal reconstruction. For a special selection of the mother  
12 wavelet function  $\psi(t)$  and the discrete set of parameters  $a_j = 2^j$  and  $b_{j,k} = 2^j k$ , with  $j, k \in \mathbb{Z}$ , the  
13 family  $\psi_{j,k}(t) = 2^{j/2} \psi(2^j t - k)$  constitutes an orthonormal basis of  $L^2(\mathbb{R})$ . Any arbitrary function  
14 of this space can therefore be uniquely decomposed, and the decomposition can be inverted  
15 (Rosso et al., 2006). The wavelet coefficients of the DWT are  $\langle S, \psi_{j,k} \rangle = C_j(k)$ . The DWT  
16 produces only as many coefficients as there are samples within the signal under analysis  $S(t)$ ,  
17 without any loss of information.

18 Let us assume that the signal is given by the equally sampled values  $S = \{s_0(n), n = 1, \dots, M\}$ , with  
19  $M$  being the total number of samples. If the decomposition is carried out over all resolution levels,  
20  $N_j = \log(M)$ , the wavelet expansion reads:

21 
$$S(t) = \sum_{j=-N_j}^{-1} \sum_k C_j(k) \psi_{j,k}(t) = \sum_{j=-N_j}^{-1} r_j(t), \quad (3)$$

22 where the wavelet coefficients  $C_j(k)$  can be interpreted as the local residual errors between  
23 successive signal approximations at scales  $j$  and  $j-1$ , respectively, and  $r_j(t)$  is the detail signal at



1 scale  $j$ , which contains information of the signal  $S(t)$  corresponding to the frequencies  $2^{j-1} \omega_s \leq |\omega|$   
 2  $\leq 2^j \omega_s$ ,  $\omega_s$  being the sampling frequency (Rosso et al., 2005, 2006).

3 Since the family  $\psi_{j,k}(t)$  is an orthonormal basis for  $L^2(\mathbb{R})$ , the concept of wavelet energy is similar  
 4 to the Fourier theory energy. Thus, the energy at each resolution level,  $j = -I, \dots, -N_J$ , will be the  
 5 energy of the detail signal:

$$6 \quad E_j = \|r_j\|^2 = \sum_k |C_j(k)|^2. \quad (4)$$

7 The total energy can be obtained summing over all the resolution levels

$$8 \quad E_{total} = \|S\|^2 = \sum_{j=-N_J}^{-1} \sum_k |C_j(k)|^2 = \sum_{j=-N_J}^{-1} E_j. \quad (5)$$

9 Finally, we define the relative wavelet energy (RWE) through the normalized  $\rho_j$  values:

$$10 \quad \rho_j = \frac{E_j}{E_{total}} \quad (6)$$

11 for the resolution levels  $j = -I, -2, \dots, -N_J$ . The distribution  $P^{(W)} \equiv \{\rho_j\}$  can be viewed as a time-scale  
 12 distribution, which is a suitable tool for detecting and characterizing phenomena in the time and  
 13 frequency spaces (Rosso et al., 2006).

14 Another extension of this discrete wavelet transform is the discrete wavelet packet  
 15 transform (DWPT). The DWPT is a generalization of the DWT that at level  $j$  of the transform  
 16 partitions the frequency axis into  $2^j$  equal width frequency bands, often labeled  $n = 0, \dots, 2^j - 1$ .  
 17 Increasing the transform level increases frequency resolution, but starting with a series of length  
 18  $N$ , at level  $j$  there are only  $N / 2^j$  DWPT coefficients for each frequency band  $n$  (Percival and  
 19 Walden, 2000).

20 The wavelet packets can be organized on an orthonormal basis of the space of finite  
 21 energy signals. The main advantage of using wavelet packets is that the standard wavelet analysis  
 22 can be extended with a flexible strategy. Thus the description of the given signal can be well

1 adapted according to the significant structures (Blanco et al., 1998). The resulting DWPT yields  
2 what can be called a time-scale-frequency decomposition because each DWPT coefficient can be  
3 localized to a particular band of frequencies and a particular interval of time (Percival and  
4 Walden, 2000). Here we use the flexibility of the DWPT to combine the energy of the  
5 decomposition frequency bands, in order to have an insight into the typical clinical frequency  
6 band decomposition: Delta, theta, alpha, beta, and gamma. Finally, we have the energy  $\{E_{Delta},$   
7  $E_{Theta}, E_{Alpha}, E_{Beta}, E_{Gamma}\}$  corresponding to each band, and the relative energy  $\{\rho_{Delta}, \rho_{Theta}, \rho_{Alpha},$   
8  $\rho_{Beta}, \rho_{Gamma}\}$  for each one of the five bands. The energy corresponding to each band is obtained  
9 by adding all the values of  $E_j$  for all the  $j$  that satisfy  $2^{j-1}\omega_s \leq |\omega| \leq 2^j\omega_s$ ,  $\omega_s$  being the sampling  
10 frequency and  $|\omega|$  being within the frequency interval corresponding to one of the five clinical  
11 frequency

## 12 **Statistical analysis**

13  
14 The behavioral data from the counting Stroop task, and the total and relative energy were analyzed  
15 using ANOVAs according to the variables of interest in each set of results. Repeated measures  
16 were included for Stimulus, Bands, and Windows, as required. A Tukey post hoc test was used to  
17 make comparisons among groups. Data were processed, analyzed, and plotted using R and  
18 Matlab.

## 19 **RESULTS**

### 20 **Behavioral results of the counting Stroop task**

21  
22 **Table 2** shows the mean percentage of correct responses and response times (RT) by each  
23 group and type of stimulus. For the RT, there was no main effect of Group ( $F(1, 44) = 0.73$ ,  $p =$   
24  $0.3963$ ), while Stimulus and the Group X Stimulus interaction were significant (Stimulus:  $F(1,$   
25  $44) = 85.89$ ,  $p < 0.0001$ ; Group X Stimulus:  $F(1, 44) = 4.66$ ,  $p = 0.0363$ ). Post hoc analysis  
26 showed that RT for the Interference stimuli were larger than the response times for No  
27 Interference stimuli both within the Theta-EEG (Mean Difference (MD) = 42.61 ms,  $p < 0.001$ )  
28 and within the Normal-EEG groups (MD = 68.5 ms,  $p < 0.001$ ); the Theta-EEG group showed

1 fewer differences between stimulus types than the Normal-EEG group. There were no  
2 differences between groups for the same type of stimulus (Interference:  $p = 0.39$ , No  
3 Interference  $p = 0.99$ ). We applied the arcsine to the percentage of correct responses in order to  
4 approximate the distribution of the data to a Gaussian distribution to use parametric statistical  
5 tests. We observed a significant main effect of Stimulus ( $F(1, 44) = 62.43$ ,  $p < 0.0001$ ) with a  
6 lower percentage of correct answers in the Interference than in the No Interference condition;  
7 however, there were no main effects of Group or Group X Stimulus interaction (Group:  $F(1, 44)$   
8  $= 0.09$ ,  $p = 0.76$ , Group X Stimulus:  $F(1, 44) = 1.24$ ,  $p = 0.27$ ). These results showed that, at the  
9 behavioral level, the Theta-EEG and Normal-EEG groups showed a Stroop effect and that they  
10 answered similarly despite the differences in their resting EEG.

### 11 **Total energy**

12 We first compared the total energy on each band between Theta-EEG and Normal-EEG groups,  
13 obtaining the total energy of the average of all electrodes (reference electrodes A1, A2 were  
14 discarded) and averaging across the counting Stroop trials for each type of stimulus. In **Figure 1**,  
15 the total energy for each group and stimulus type is shown in each of the frequency bands. For  
16 the delta band we found a main effect of Group ( $F(1, 86) = 11.003$ ,  $p = 0.00133$ ), while neither  
17 Stimulus ( $F(1, 86) = 0.416$ ,  $p = 0.51961$ ) nor the Group X Stimulus interaction were significant  
18 ( $F(1, 86) = 0.036$ ,  $p = 0.84973$ ). In the theta band, there was a main effect of Group ( $F(1, 86) =$   
19  $11.605$ ,  $p = 0.001$ ), while no significant differences were observed in Stimulus ( $F(1, 86) = 0.031$ ,  
20  $p = 0.862$ ) or in the Group X Stimulus interaction ( $F(1, 86) = 0.01$ ,  $p = 0.919$ ). Similarly, in the  
21 alpha band there was a main effect of Group ( $F(1, 86) = 8.539$ ,  $p = 0.00444$ ), while Stimulus ( $F(1,$   
22  $86) = 0.002$ ,  $p = 0.96375$ ) and the Group X Stimulus interaction remained without statistical  
23 significance ( $F(1, 86) = 0.004$ ,  $p = 0.95266$ ).

24 For the beta band, neither Group ( $F(1, 86) = 0.836$ ,  $p = 0.363$ ) nor Stimulus ( $F(1,$   
25  $86) = 0.099$ ,  $p = 0.753$ ) or the Group X Stimulus interaction were significant ( $F(1, 86) = 0.078$ ,  $p =$   
26  $0.781$ ). Similar results were observed in the gamma band, no significant differences were found  
27 for Group ( $F(1, 86) = 0.330$ ,  $p = 0.567$ ), Stimulus ( $F(1, 86) = 0.127$ ,  $p = 0.723$ ) or the Group X

1 Stimulus interaction ( $F(1, 86) = 0.027, p = 0.869$ ).

2 Altogether, our analysis of the total energy showed a higher amount of energy in the  
3 Theta-EEG group in the delta, theta, and alpha bands irrespective of the type of stimulus presented  
4 during the counting Stroop task. In contrast, no significant differences in the total energy were  
5 observable in the beta and gamma bands, **Figure 1**.

6 We explored how the total energy was distributed among the electrodes for each band,  
7 **Figure 2**. We observed a higher total energy in the Theta-EEG group than in the Normal-EEG  
8 group in delta and theta bands. This increase in total energy was similar for both types of  
9 stimulus. For the delta band, the total energy increase was located in the midline electrodes,  
10 while for the theta band, the total energy increase was more pronounced in occipital electrodes.  
11 No increase in total energy was visible in alpha, beta, and gamma bands.

12

### 13 **Relative energy**

14 To consider variations in the total amount of energy among subjects, we further studied the  
15 relative wavelet energy for the entire signal. The relative energy corresponds to the amount of  
16 energy in a given band, relative to the total energy involved in all bands.

17 In **Figure 3** the relative energy per frequency band is shown for each group and stimulus type. In  
18 the delta band we observed a main effect of Group ( $F(1, 86) = 10.346, p = 0.00183$ ) but not of  
19 Stimulus ( $F(1, 86) = 0.678, p = 0.41269$ ) or the Group X Stimulus interaction ( $F(1, 86) = 0.056, p$   
20  $= 0.81351$ ). In the theta band neither of the variables nor the interaction between them were  
21 significant [Group ( $F(1, 86) = 1.651, p = 0.202$ ); Stimulus ( $F(1, 86) = 0.165, p = 0.686$ ); Group X  
22 Stimulus ( $F(1, 86) = 0.186, p = 0.668$ )]. For the alpha band there were no statistical differences  
23 for any of the effects or the interaction between them [Group ( $F(1, 86) = 0.070, p = 0.793$ );  
24 Stimulus ( $F(1, 86) = 0.021, p = 0.886$ ); Group X Stimulus ( $F(1, 86) = 0.062, p = 0.804$ )].

25 The relative energy in the beta band showed a main effect of Group ( $F(1, 86) = 13.401, p =$

1 0.000433) but not for Stimulus ( $F(1, 86) = 1.676, p = 0.198983$ ) or for the Group X Stimulus  
2 interaction ( $F(1, 86) = 0.312, p = 0.577787$ ). Similarly, for the gamma band, there was a main  
3 effect of Group ( $F(1, 86)=7.017, p = 0.00961$ ), but no differences were observed for Stimulus  
4 ( $F(1, 86) = 0.259, p = 0.61188$ ) or for the Group X Stimulus interaction ( $F(1, 86) = 0.038, p =$   
5  $0.84581$ ).

6 Our analysis thus showed that even after normalizing by the total amount of energy used  
7 during the task, the Theta-EEG group showed an increase of energy in the delta band, as compared  
8 to the Normal-EEG group, which was independent of the type of stimulus presented. Interestingly,  
9 a decrease in relative energy was observed in the beta and gamma bands.

10

### 11 **Total energy across windows**

12 To analyze the signal in the time-space, we took time windows of at least  $2^7 + 1 = 129$  points,  
13 which corresponded to 258 ms; this procedure allowed us to analyze five time-windows in the  
14 ERP signal. **Figure 4** shows the total energy per window. For the delta band, significant main  
15 effects of Group ( $F(1, 430) = 21.058, p = 5.86e-06$ ) and Window ( $F(4, 430) = 12.610, p = 1.04e-$   
16  $09$ ) were observed but there were not significant effects in Stimulus ( $F(1, 430) = 0.149, p = 0.7$ )  
17 or the interaction among factors [Group X Stimulus ( $F(1, 430) = 0.062, p = 0.804$ ); Group X  
18 Window ( $F(4, 430) = 0.79, p = 0.532$ ); Stimulus X Window ( $F(4, 430) = 0.307, p = 0.873$ ); Group  
19 X Stimulus X Window ( $F(4, 430) = 0.367, p = 0.832$ )]. The analysis of the Window factor showed  
20 that the total energy in the window 258-516 ms was higher than the total energy from windows  
21 0-258, 516-774, and 774-1032 ms ( $p \leq 0.03783$  for each comparison). For this same band, the  
22 total energy in the window 1032-1290 was higher than the energy in the window 0-258 ( $p =$   
23  $0.00893$ ).

24 For the theta band, there were significant main effects of Group ( $F(1, 430) = 30.596, p = 5.53e-$   
25  $08$ ) and Window ( $F(4, 430) = 17.546, p = 2.38e-13$ ) but not of Stimulus ( $F(1, 430) = 0.279, p =$

1 0.5978). The interaction Group X Window was close to significance ( $F(4, 430) = 2.229$ ,  $p =$   
2 0.0651), while the other interactions were not significant [Group X Stimulus ( $F(1, 430) = 0.241$ ,  
3  $p = 0.624$ ); Stimulus X Window ( $F(4, 430) = 0.298$ ,  $p = 0.8794$ ); Group X Stimulus X Window  
4 ( $F(4, 430) = 0.321$ ,  $p = 0.8639$ )]. The analysis of the Window factor showed that the total energy  
5 in the window 258-516 ms was higher than the total energy in all the other windows ( $p < 0.0001$   
6 for all the comparisons). The post hoc test for the interaction Group X Window showed that in  
7 the window 258-516 ms the total energy was higher in the Theta-EEG group as compared to the  
8 Normal-EEG group ( $p = 0.0065$ ), **Figure 4**.

9 For the alpha band, the total energy showed significant main effects of Group ( $F(1, 430) = 23.548$ ,  
10  $p = 1.71e-06$ ) and Window ( $F(4, 430) = 34.484$ ,  $p < 2e-16$ ), while Stimulus was not significant  
11 ( $F(1, 430) = 0.005$ ,  $p = 0.9452$ ). The interaction Group X Window was close to statistical  
12 significance ( $F(4, 430) = 2.163$ ,  $p = 0.0724$ ), while other interactions did not show significant  
13 differences [Group X Stimulus ( $F(1, 430) = 0.03$ ,  $p = 0.8622$ ); Stimulus X Window ( $F(4, 430) =$   
14  $0.053$ ,  $p = 0.9947$ ); Group X Stimulus X Window ( $F(4, 430) = 0.149$ ,  $p = 0.9633$ )]. The analysis  
15 of the Window factor showed that the total energy in the window 258-516 ms was higher than the  
16 energy in all the other windows ( $p < 0.0001$  for each comparison). The analysis of the interaction  
17 Group X Window showed that the total energy in the window 258-516 ms was higher in the  
18 Theta-EEG group as compared to the energy in the Normal-EEG group ( $p = 0.0079$ ), **Figure 4**.

19 For the beta band we found significant main effects of Group ( $F(1, 430) = 10.868$ ,  $p = 0.00106$ )  
20 and Window ( $F(4, 430) = 17.402$ ,  $p = 3.03e-13$ ), while there were no statistical differences for  
21 Stimulus ( $F(1, 430) = 0.311$ ,  $p = 0.57723$ ). None of the interactions of the factors was significant  
22 either [Group X Stimulus ( $F(1, 430) = 0.105$ ,  $p = 0.74663$ ); Group X Window ( $F(4, 430) = 1.046$ ,  
23  $p = 0.3829$ ); Stimulus X Window ( $F(4, 430) = 0.295$ ,  $p = 0.88137$ ); Group X Stimulus X Window  
24 ( $F(4, 430) = 0.2$ ,  $p = 0.93804$ )]. The post hoc comparisons of the Window factor showed that the  
25 total energy in 258-516 ms was higher than the energy in all the other windows ( $p \leq 0.0143$  for  
26 all the comparisons). Additionally, the energy in the 1032-1290 ms window was higher than the  
27 energy observed in the 0-258 ms window ( $p = 0.0261$ ), **Figure 4**.

1 Finally, the analysis of total energy in the gamma band revealed a significant main effect of  
2 Window ( $F(4, 430) = 4.018, p = 0.00328$ ), while Group ( $F(1, 430) = 3.242, p = 0.07246$ ) and  
3 Stimulus ( $F(1, 430) = 0.318, p = 0.57321$ ) did not reach significance. None of the interactions  
4 among factors was significant [Group X Stimulus ( $F(1, 430) = 0.053, p = 0.81849$ ); Group X  
5 Window ( $F(4, 430) = 0.021, p = 0.99915$ ); Stimulus X Window ( $F(4, 430) = 0.093, p = 0.98453$ );  
6 Group X Stimulus X Window ( $F(4, 430) = 0.037, p = 0.99741$ )]. The analysis of the Window  
7 factor showed that the total energy in the 258-516 ms window was higher than the energy in the  
8 windows 0-258, 516-774, and 774-1032 ms ( $p < 0.01$  for all comparisons). The total energy in  
9 the window 1032-1290 ms was also higher than the energy observed in the windows 0-258, 516-  
10 774, and 774-1032 ms ( $p \leq 0.002$  for all comparisons), **Figure 4**.

11 Taken together, our analysis across windows revealed a higher amount of total energy in  
12 the Theta-EEG group as compared to the Normal-EEG group in the delta, theta, alpha, and beta  
13 bands irrespective of the type of stimulus presented. For theta and alpha bands, the total energy  
14 was higher in the Theta-EEG group than in the Normal-EEG group, specifically for the window  
15 258-516 ms, **Figure 4**.

16 A topographical analysis of the total energy across windows for the theta band corroborated the  
17 relevance of the 258-516 ms window. The topographical distribution of the energy per group  
18 and type of stimulus through the time is shown in **Figure 5**. We observed a higher total energy  
19 in the Theta-EEG group as compared to the Normal-EEG group only in the 258-516 ms  
20 window. The amount of total energy looked similar for both types of stimulus in the same EEG  
21 group. The increased energy for this theta band in the Theta-EEG group was more prominent in  
22 mid-line and occipital electrodes. Similar changes were observed in delta and alpha bands  
23 (**Figure 5-1 and 5-2**): increased total energy for both types of stimulus in the Theta-EEG group  
24 was observed in mid-line and occipital electrodes towards frontal regions; this change was  
25 prominent in the 258-516 ms window.

26 **Wavelet analysis on central electrodes**

1 Then, we performed an analysis for central electrodes to better depict the information added by  
2 wavelet analysis when studying the data obtained by ERP, **Figure 6**. The wavelet transform of  
3 the voltage in the CPZ electrode showed a significant Group X Window interaction in delta,  
4 theta, and alpha bands in the total energy, **Table 3**. The post hoc test showed that the total  
5 energy was higher in the Theta-EEG group than in the Normal-EEG group in the 258-516 ms  
6 window for the three bands ( $p \leq 0.0141$ ). The differences in total energy for CPZ electrode in  
7 delta, theta, and alpha bands were independent of the type of stimulus presented (Stimulus,  
8 Group X Stimulus, Stimulus X Window, and Group X Stimulus X Window were not  
9 significant; **Table 3**). Although the Group X Window interaction was significant for the beta  
10 band (**Table 3**), the post hoc comparison did not show any statistical difference between Theta-  
11 EEG and Normal-EEG conditions for any given window ( $p \geq 0.0720$ ). For the gamma band,  
12 there was a significant effect of Group and Window but not for other factors or interactions,  
13 **Table 3**.

14 The total energy in the PZ electrode showed a significant Group X Window interaction for the  
15 delta, and theta bands, **Table 3**. The total energy was higher in the Theta-EEG group for the  
16 258-516 ms window ( $p \leq 0.0005$  for delta and theta bands). In the alpha, beta, and gamma  
17 bands, only the factors Group and Window showed statistical significance, **Table 3**.

18 A similar increase in the total energy in the alpha band was observed in FCZ and CZ electrodes  
19 for the Theta-EEG group. There was a significant Group X Window interaction in the alpha  
20 band for both electrodes, **Table 3**. The total energy was higher in the Theta-EEG group than in  
21 the Normal-EEG group only in the 258-516 ms window (FCZ  $p = 0.0288$ ; CZ  $p = 0.0175$ ). For  
22 the CZ electrode, the Group X Window interaction was significant for the beta band; however,  
23 the post hoc comparisons did not show statistical differences for any specific time window,  
24 **Table 3**. For FCZ and CZ electrodes, only the factors Group and Window showed statistical  
25 significance for delta, theta, and gamma bands, **Table 3**.

26 Taken together, our analysis of wavelet transform for central electrodes showed that the total  
27 energy was higher in the Theta-EEG group than in the Normal-EEG group in the 258-516 ms  
28 window in the delta and theta bands for more posterior electrodes (CPZ, PZ). The increase in



1 total energy in the Theta-EEG group was observed in the 258-516 ms window for the alpha  
2 band in more anterior electrodes (FCZ, CZ).

### 3 **DISCUSSION**

4 In this study we aimed to explore whether the amount of energy obtained from ERP during a  
5 counting Stroop task was different between a group of elderly with an excess of theta activity in  
6 their EEG and a group of elderly with normal EEG. We evaluated the amount of energy between  
7 EEG groups for each of the frequency bands across different time windows. Overall, we found a  
8 higher energy in the group with theta excess that might help understand the increased risk of  
9 cognitive decline in this group of elderly.

#### 10 **Behavioral evidence**

11 The results at the behavioral level showed that there were no major differences between the  
12 groups. These were expected results if we consider that the only difference between the groups  
13 was at the electrophysiological level in the quantitative EEG analysis. Furthermore, the Theta-  
14 EEG and Normal-EEG groups showed a Stroop effect (i.e., longer reaction times for interference  
15 stimuli) and they answered with similar efficacy despite the differences in their resting EEG,

#### 16 **Table 2.**

#### 17 **Wavelet evidence**

#### 18 **Total energy analysis**

19 During the counting Stroop task performance, we observed that, for both types of stimulus, the  
20 Theta-EEG group requires a higher energy in delta, theta, and alpha bands than the Normal-EEG  
21 group, **Figures 1 and 2**. Given that the total energy ( $\mu V^2$ ) is related to the number of synchronized  
22 active neurons and that no major differences between groups were observed in the performance  
23 of the counting Stroop task, we think that a higher expenditure of energy is the biological  
24 mechanism that allows the Theta-EEG group to cope with the cognitive demands of this task.

1           In fMRI it has been observed that the healthy elderly have a greater neural activity during  
2 the performance of Stroop tasks as compared to young subjects (Cabeza, 2002; Milham et al.,  
3 2002; Langenecker et al., 2004; Zysset et al., 2007; Mathis et al., 2009). This enhanced activity  
4 might be interpreted as a compensatory mechanism developed by them to achieve an optimum  
5 performance (Zysset et al., 2007; Mathis et al., 2009) or it may reflect a difficulty in recruiting  
6 specialized neuronal circuits (Cabeza, 2002). Furthermore, in fMRI and ERP studies, the elderly  
7 with MCI or with electrophysiological risk for cognitive decline, exhibited greater brain activity  
8 than healthy elderly (Kaufmann et al., 2008; Sánchez-Moguel et al., 2018). From the point of  
9 view of the performance of the task, it is evident that this compensatory mechanism is being  
10 effective in both the affected elderly with MCI and the Theta-EEG group. However, a higher  
11 energy expenditure of unspecialized neuronal circuits in the task might trigger anomalous cellular  
12 processes that are hallmarks of neurodegenerative diseases (Mattson and Arumugam, 2018),  
13 making this compensatory mechanism ineffective in the long term. The affected elderly will then  
14 have an anomalous activation of the involved circuits, and they will show a dysregulated energetic  
15 metabolism (Mattson and Arumugam, 2018).

16           The greater expenditure of energy in the Theta-EEG group observed in delta and theta  
17 bands agrees with the finding that increased activity in these bands predicts the development of  
18 cognitive impairment (Prichep et al., 2006; van der Hiele et al., 2008), **Figures 1, 2, and 4**. On  
19 the other hand, some studies suggest that increases in alpha power are related to success in  
20 inhibiting irrelevant information (Herrmann and Knight, 2001; Werkle-Bergner et al., 2012). This  
21 set of works supports our interpretation that the Theta-EEG group has a higher expenditure of  
22 alpha energy in order to perform the task with the same efficiency as the Normal-EEG group.  
23 Furthermore, the greater expenditure of energy in the alpha band in the Theta-EEG group can be  
24 explained by a topographic reorganization of the alpha rhythm during aging in which it is biased  
25 towards more frontal regions (Evans & Abarbanel, 1999), **Figure 5-2**. As mentioned earlier, these  
26 EEG changes are exacerbated in patients with dementia or MCI (Prichep et al., 1994).

1           We know that the brain resists entropy or disorder by maintaining its balance through the  
2 process of homeostasis (Friston et al., 2006; Friston, 2009, 2010). It is clear that the Theta-EEG  
3 group allocates more energy to maintain this homeostatic balance. However, over time the  
4 increased energy expenditure can promote neural metabolic imbalances more rapidly, causing the  
5 development of cognitive impairment.

## 6 **Analysis of relative energy**

7 There was a greater energy expenditure in both EEG groups in the delta and theta bands compared  
8 to the other bands, **Figure 3**. In the Theta-EEG group, the energy expenditure of the delta band  
9 was greater than in the Normal-EEG group; this relationship reverts in beta and gamma bands,  
10 **Figure 3**. Patients at risk of cognitive impairment (Prichep et al., 2006; van der Hiele et al., 2008)  
11 or that transition from MCI to Alzheimer (Huang et al., 2000; Jelic et al., 2000; Rossini et al.,  
12 2006) show an increase in the delta and theta power and a decrease in the beta relative power.  
13 The beta band is sensitive to the discrimination of interference and no interference stimuli in  
14 Stroop tasks (Schack et al., 1999), while the gamma band has a prominent role in the coupling of  
15 excitatory and inhibitory neuronal networks (Fries, 2009). This lower energy expenditure in beta  
16 and gamma bands in addition to the increased theta activity in the Theta-EEG group could then  
17 explain the inhibitory control impaired at the electrophysiological level previously reported by  
18 Sánchez-Moguel et al. (2018). Based on the higher risk of cognitive impairment of the Theta-  
19 EEG group (Sánchez-Moguel et al., 2018), we suggest that the greater relative energy in delta  
20 band and the lower relative energy in beta and gamma bands during the performance of the Stroop  
21 task may be related to the progression to MCI.

## 22 **Analysis of total energy across time windows**

23 The greater total energy in both EEG groups occurred in the 258-516 ms window for all bands,  
24 **Figures 4, 5, and 6**. In ERP studies, it has been observed that this time window is sensitive to the  
25 categorization of interference and no interference words (Zurrón et al., 2009; Sánchez-Moguel et  
26 al., 2018). Then we interpret that this greater energy expenditure is required to categorize the  
27 stimuli. The total energy for this time window was higher for the Theta-EEG group in the theta

1 and alpha bands. We interpret that this increased energy is a mechanism that allows the Theta-  
2 EEG group to discriminate the stimuli with a similar efficiency as the Normal-EEG group.

3 The total energy expenditure for each stimulus condition in the different bands was  
4 similar within each EEG group, **Figures 1, 6, and Table 3**. This is an interesting result given the  
5 increased complexity of the interference as compared to the no interference stimuli because  
6 reading and counting processes are in competition (West and Alain, 2000; Bush et al., 2006)  
7 causing the RT to be longer in interference stimuli. We expected that longer RT would be related  
8 to higher energy expenditure. These results then suggest that in elderly adults, the processing of  
9 Interference and No Interference stimuli demands similar neuronal resources that might differ  
10 from young adults, a proposal that needs further study.

## 11 **OVERVIEW**

12 In summary, the expenditure of energy was higher in the Theta-EEG group during a counting  
13 Stroop task. The energy analysis of ERP using wavelets showed that during the execution of the  
14 Stroop task: (1) Theta-EEG group assigns a greater amount of total energy in delta, theta, and  
15 alpha bands than the Normal-EEG group. (2) Theta-EEG group demands a higher amount of  
16 relative energy in delta band but less energy in beta and gamma bands than the normal-EEG  
17 group. (3) Theta-EEG group uses higher total energy in all-time windows in the delta, theta, alpha,  
18 and beta bands. (4) In the theta and alpha bands, the energy is greater in the Theta-EEG group,  
19 specifically in the time window 258-516 ms related to stimulus categorization processing. Thus  
20 the current findings emphasize the relevance of a wavelet analysis for diagnosis of neurological  
21 disorders, as in recent studies (Faust et al., 2015; Bhattacharyya and Pachori, 2017; Alturki et al.,  
22 2020).

23 We propose that this excessive energy expenditure in the Theta-EEG group is due because  
24 more neurons are recruited in order to perform the task with the same efficiency as the Normal-  
25 EEG group. However, we do not know if this energy expenditure is an effective long-term

1 mechanism since neurons could be being recruited from unspecialized regions, and there could  
2 be cellular and metabolic imbalances that promote progress to cognitive impairment.  
3 Furthermore, since the Theta-EEG group participants have a higher risk of developing cognitive  
4 impairment and already show detriment of inhibitory control at the electrophysiological level, we  
5 suggest that this excessive energy expenditure begins to be anomalous.

6 Imaging techniques such as fMRI, diffusion tensor imaging, and magnetic resonance  
7 spectroscopy, that evaluate the neural networks involved in the task and metabolic expenditure,  
8 would complement our findings. Additionally, we suggest exploring energy expenditure during  
9 the performance of tasks related to other cognitive processes that are known to be altered in  
10 patients at risk of cognitive impairment.

## 11 REFERENCES

- 12 Alturki FA, AlSharabi K, Abdurraqueeb AM, Aljalal M (2020) EEG Signal Analysis for  
13 Diagnosing Neurological Disorders Using Discrete Wavelet Transform and Intelligent  
14 Techniques. *Sensors* 20:2505.
- 15 Amieva H (2004) Evidencing inhibitory deficits in Alzheimer's disease through interference  
16 effects and shifting disabilities in the Stroop test. *Arch Clin Neuropsychol* 19:791–803.
- 17 Babor TF, Higgins-Biddle JC, Saunders JB, Monteiro MG (2001) AUDIT: the Alcohol Use  
18 Disorders Identification Test : guidelines for use in primary health care. World Health Organ  
19 Available at: <https://apps.who.int/iris/handle/10665/67205>.
- 20 Beck AT, Ward CH, Mendelson M, Mock J, Erbaugh J (1961) An inventory for measuring  
21 depression. *Arch Gen Psychiatry* 4:561–571.
- 22 Bhattacharyya A, Pachori RB (2017) A Multivariate Approach for Patient-Specific EEG  
23 Seizure Detection Using Empirical Wavelet Transform. *IEEE Trans Biomed Eng* 64:2003–  
24 2015.
- 25 Blanco S, Figliola A, Quiroga RQ, Rosso OA, Serrano E (1998) Time-frequency analysis of  
26 electroencephalogram series. III. Wavelet packets and information cost function. *Phys Rev E*

- 1 57:932–940.
- 2 Bush G, Whalen PJ, Shin LM, Rauch SL (2006) The counting Stroop: a cognitive interference  
3 task. *Nat Protoc* 1:230–233.
- 4 Buzsáki G (2006) *Rhythms of the brain*. Oxford ; New York: Oxford University Press.
- 5 Cabeza R (2002) Hemispheric asymmetry reduction in older adults: the HAROLD model.  
6 *Psychol Aging* 17:85–100.
- 7 Cabeza R, Daselaar SM, Dolcos F, Prince SE, Budde M, Nyberg L (2004) Task-independent  
8 and task-specific age effects on brain activity during working memory, visual attention and  
9 episodic retrieval. *Cereb Cortex N Y N 1991* 14:364–375.
- 10 Chang BS, Schomer DL, Niedermeyer E (2011) “Normal EEG and sleep: adults and elderly. In:  
11 Niedermeyer’s *Electroencephalography: Basic Principles, Clinical Applications, and Related*  
12 *Fields*, pp 183–214. New York: Wolters Kluwer, Lippincott Williams & Wilkins.
- 13 Diamond A (2020) Chapter 19 - Executive functions. In: *Handbook of Clinical Neurology*  
14 (Gallagher A, Bulteau C, Cohen D, Michaud JL, eds), pp 225–240. Elsevier. Available at:  
15 <http://www.sciencedirect.com/science/article/pii/B9780444641502000204>.
- 16 Endicott J, Nee J, Harrison W, Blumenthal R (1993) Quality of Life Enjoyment and Satisfaction  
17 Questionnaire: a new measure. *Psychopharmacol Bull* 29:321–326.
- 18 Evans JR, Abarbanel A (1999) *Introduction to Quantitative EEG and Neurofeedback*. Elsevier.
- 19 Faust O, Acharya UR, Adeli H, Adeli A (2015) Wavelet-based EEG processing for computer-  
20 aided seizure detection and epilepsy diagnosis. *Seizure* 26:56–64.
- 21 Fries P (2009) Neuronal gamma-band synchronization as a fundamental process in cortical  
22 computation. *Annu Rev Neurosci* 32:209–224.
- 23 Friston K (2009) The free-energy principle: a rough guide to the brain? *Trends Cogn Sci*  
24 13:293–301.
- 25 Friston K (2010) The free-energy principle: a unified brain theory? *Nat Rev Neurosci* 11:127–  
26 138.
- 27 Friston K, Kilner J, Harrison L (2006) A free energy principle for the brain. *J Physiol-Paris*  
28 100:70–87.

- 1 Goupillaud P, Grossmann A, Morlet J (1984) Cycle-octave and related transforms in seismic  
2 signal analysis. *Geoexploration* 23:85–102.
- 3 Gratton G, Coles MGH, Donchin E (1983) A new method for off-line removal of ocular artifact.  
4 *Electroencephalogr Clin Neurophysiol* 55:468–484.
- 5 Hernández JL, Valdés P, Biscay R, Virues T, Szava S, Bosch J, Riquenes A, Clark I (1994) A  
6 global scale factor in brain topography. *Int J Neurosci* 76:267–278.
- 7 Herrmann CS, Knight RT (2001) Mechanisms of human attention: event-related potentials and  
8 oscillations. *Neurosci Biobehav Rev* 25:465–476.
- 9 Huang C, Wahlund L, Dierks T, Julin P, Winblad B, Jelic V (2000) Discrimination of  
10 Alzheimer’s disease and mild cognitive impairment by equivalent EEG sources: a cross-  
11 sectional and longitudinal study. *Clin Neurophysiol Off J Int Fed Clin Neurophysiol* 111:1961–  
12 1967.
- 13 Jelic V, Johansson SE, Almkvist O, Shigeta M, Julin P, Nordberg A, Winblad B, Wahlund LO  
14 (2000) Quantitative electroencephalography in mild cognitive impairment: longitudinal changes  
15 and possible prediction of Alzheimer’s disease. *Neurobiol Aging* 21:533–540.
- 16 Kaufmann L, Ischebeck A, Weiss E, Koppelstaetter F, Siedentopf C, Vogel SE, Gotwald T,  
17 Marksteiner J, Wood G (2008) An fMRI study of the numerical Stroop task in individuals with  
18 and without minimal cognitive impairment. *Cortex* 44:1248–1255.
- 19 Langenecker SA, Nielson KA, Rao SM (2004) fMRI of healthy older adults during Stroop  
20 interference. *NeuroImage* 21:192–200.
- 21 Lopes da Silva FH (2011) Neurocognitive processes and the EEG/MEG. In: Niedermeyer’s  
22 electroencephalography: Basic principles, clinical applications, and related fields, eds. Schomer,  
23 D. L., and Lopes da Silva, F.H., 6th ed., pp 1083–1112. New York, NY: Wolters Kluwer,  
24 Lippincott Williams & Wilkins.
- 25 MacLeod CM (1991) Half a century of research on the Stroop effect: an integrative review.  
26 *Psychol Bull* 109:163–203.
- 27 Mathis A, Schunck T, Erb G, Namer IJ, Luthringer R (2009) The effect of aging on the  
28 inhibitory function in middle-aged subjects: a functional MRI study coupled with a color-

- 1 matched Stroop task. *Int J Geriatr Psychiatry* 24:1062–1071.
- 2 Mattson MP, Arumugam TV (2018) Hallmarks of Brain Aging: Adaptive and Pathological  
3 Modification by Metabolic States. *Cell Metab* 27:1176–1199.
- 4 Milham MP, Erickson KI, Banich MT, Kramer AF, Webb A, Wszalek T, Cohen NJ (2002)  
5 Attentional control in the aging brain: insights from an fMRI study of the Stroop task. *Brain*  
6 *Cogn* 49:277–296.
- 7 Ostrosky-Solís F, Ardila A, Rosselli M (1999) NEUROPSI: A brief neuropsychological test  
8 battery in Spanish with norms by age and educational level. *J Int Neuropsychol Soc* 5:413–433.
- 9 Percival DB, Walden AT (2000) *Wavelet Methods for Time Series Analysis*. Cambridge  
10 University Press.
- 11 Prichep LS, John ER, Ferris SH, Rausch L, Fang Z, Cancro R, Torossian C, Reisberg B (2006)  
12 Prediction of longitudinal cognitive decline in normal elderly with subjective complaints using  
13 electrophysiological imaging. *Neurobiol Aging* 27:471–481.
- 14 Prichep LS, John ER, Ferris SH, Reisberg B, Almas M, Alper K, Cancro R (1994) Quantitative  
15 eeg correlates of cognitive deterioration in the elderly. *Neurobiol Aging* 15:85–90.
- 16 Ramos-Goicoa M, Galdo-Álvarez S, Díaz F, Zurrón M (2016) Effect of Normal Aging and of  
17 Mild Cognitive Impairment on Event-Related Potentials to a Stroop Color-Word Task. *J*  
18 *Alzheimers Dis* 52:1487–1501.
- 19 Reisberg B, Ferris SH, de Leon MJ, Crook T (1982) The Global Deterioration Scale for  
20 assessment of primary degenerative dementia. *Am J Psychiatry* 139:1136–1139.
- 21 Reisberg B, Ferris SH, Kluger A, Franssen E, Wegiel J, de Leon MJ (2008) Mild cognitive  
22 impairment (MCI): a historical perspective. *Int Psychogeriatr* 20:18–31.
- 23 Rey-Mermet A, Gade M (2018) Inhibition in aging: What is preserved? What declines? A meta-  
24 analysis. *Psychon Bull Rev* 25:1695–1716.
- 25 Román Lapuente F, Sánchez Navarro JP (1998) Cambios neuropsicológicos asociados al  
26 envejecimiento normal. *An Psicol* 14:27–43.
- 27 Rossini PM, Del Percio C, Pasqualetti P, Cassetta E, Binetti G, Dal Forno G, Ferreri F, Frisoni  
28 G, Chioventa P, Miniussi C, Parisi L, Tombini M, Vecchio F, Babiloni C (2006) Conversion



1 from mild cognitive impairment to Alzheimer's disease is predicted by sources and coherence  
2 of brain electroencephalography rhythms. *Neuroscience* 143:793–803.

3 Rosso OA, Martin MT, Figliola A, Keller K, Plastino A (2006) EEG analysis using wavelet-  
4 based information tools. *J Neurosci Methods* 153:163–182.

5 Rosso OA, Martin MT, Plastino A (2005) Evidence of self-organization in brain electrical  
6 activity using wavelet-based informational tools. *Phys Stat Mech Its Appl* 347:444–464.

7 Sánchez-Moguel SM, Alatorre-Cruz GC, Silva-Pereyra J, González-Salinas S, Sanchez-Lopez  
8 J, Otero-Ojeda GA, Fernández T (2018) Two Different Populations within the Healthy Elderly:  
9 Lack of Conflict Detection in Those at Risk of Cognitive Decline. *Front Hum Neurosci* 11  
10 Available at: <https://www.ncbi.nlm.nih.gov/pmc/articles/PMC5768990/>.

11 Schack B, Chen AC, Mescha S, Witte H (1999) Instantaneous EEG coherence analysis during  
12 the Stroop task. *Clin Neurophysiol Off J Int Fed Clin Neurophysiol* 110:1410–1426.

13 Thomas AK, Dave JB, Bonura BM (2010) Theoretical Perspectives on Cognitive Aging. In:  
14 *Handbook of Medical Neuropsychology: Applications of Cognitive Neuroscience* (Armstrong  
15 CL, Morrow L, eds), pp 297–313. New York, NY: Springer New York. Available at:  
16 [https://doi.org/10.1007/978-1-4419-1364-7\\_16](https://doi.org/10.1007/978-1-4419-1364-7_16).

17 Valdés P, Biscay R, Galán L, Bosch J, Zsava S, Virués T (1990) High resolution spectral EEG  
18 norms topography. *Brain Topogr* 3:281–282.

19 van der Hiele K, Bollen EL, Vein AA, Reijntjes RH, Westendorp RG, van Buchem MA,  
20 Middelkoop HA, van Dijk JG (2008) EEG markers of future cognitive performance in the  
21 elderly. *J Clin Neurophysiol* 25:83–89.

22 Wechsler D (2003) *Wais-III escala wechsler de inteligencia para adultos-III*, 2nd ed. México:  
23 Manual Moderno.

24 Weisz J, Czigler I (2006) Age and novelty: Event-related brain potentials and autonomic  
25 activity. *Psychophysiology* 43:261–271.

26 Werkle-Bergner M, Freunberger R, Sander MC, Lindenberger U, Klimesch W (2012) Inter-  
27 individual performance differences in younger and older adults differentially relate to amplitude  
28 modulations and phase stability of oscillations controlling working memory contents.

- 1 NeuroImage 60:71–82.
- 2 West R, Alain C (2000) Age-related decline in inhibitory control contributes to the increased
- 3 stroop effect observed in older adults. *Psychophysiology* 37:179–189.
- 4 Yesavage JA, Brink TL, Rose TL, Lum O, Huang V, Adey M, Leirer VO (1982) Development
- 5 and validation of a geriatric depression screening scale: a preliminary report. *J Psychiatr Res*
- 6 17:37–49.
- 7 Zurrón M, Pouso M, Lindín M, Galdo S, Díaz F (2009) Event-related potentials with the stroop
- 8 colour-word task: timing of semantic conflict. *Int J Psychophysiol* 72:246–252.
- 9 Zysset S, Schroeter ML, Neumann J, Yves von Cramon D (2007) Stroop interference,
- 10 hemodynamic response and aging: An event-related fMRI study. *Neurobiol Aging* 28:937–946.

11 **Figures**

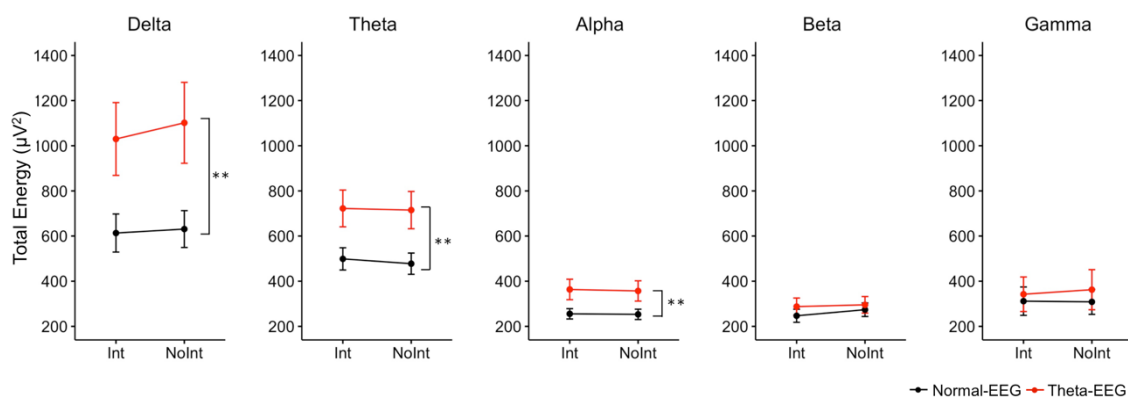

- 12
- 13 **Figure 1. Total energy.** Data were obtained from the average across electrodes (reference
- 14 electrodes excluded) for Interference (Int) and No Interference (NoInt) stimuli during the
- 15 counting Stroop task. \*\*  $p < 0.01$  for group factor from two-way ANOVA. Data are expressed
- 16 as means with standard error bars.

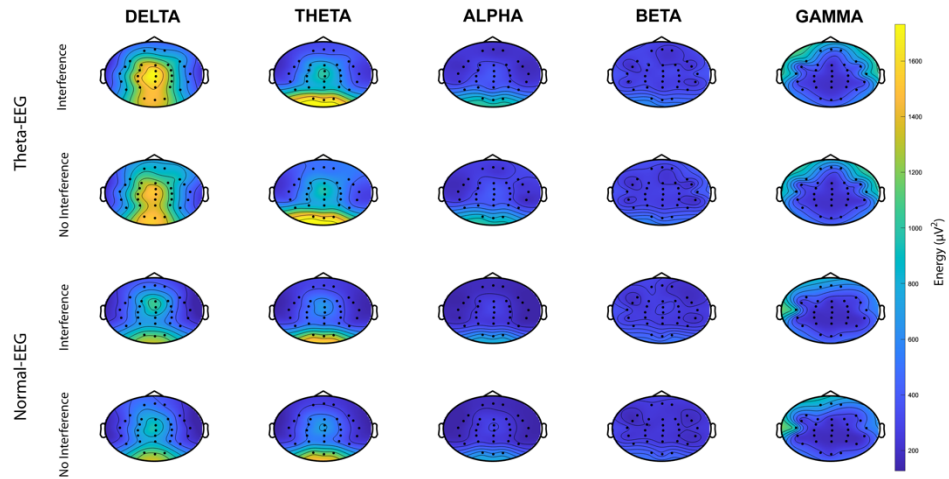

1

2 **Figure 2. Topographic distribution of total energy.** Total energy is shown for the different  
3 bands during Interference and No Interference stimuli according to the EEG group. The color  
4 scale is expressed in  $\mu V^2$ .

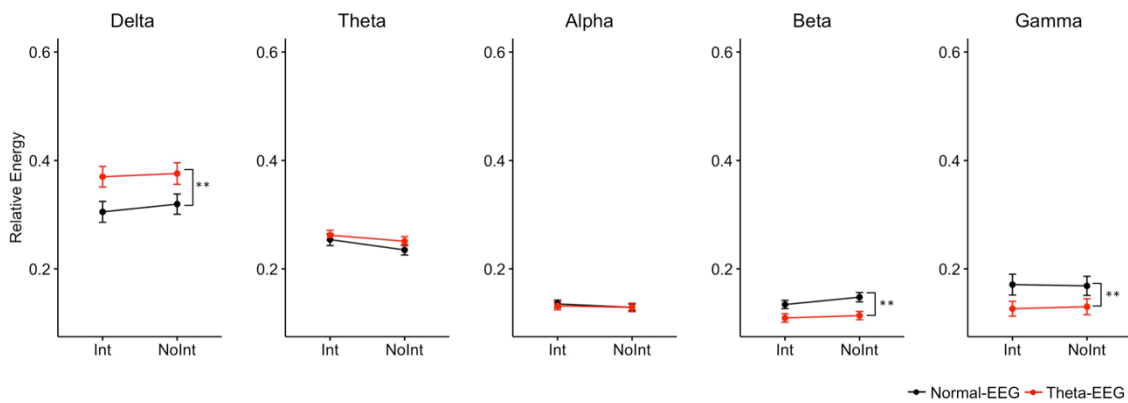

5

6 **Figure 3: Relative energy.** Data are shown for each band according to the EEG group and to the  
7 type of stimulus. Data are expressed as means with standard error bars. \*\* p < 0.01 for group  
8 factor from two way-ANOVA.

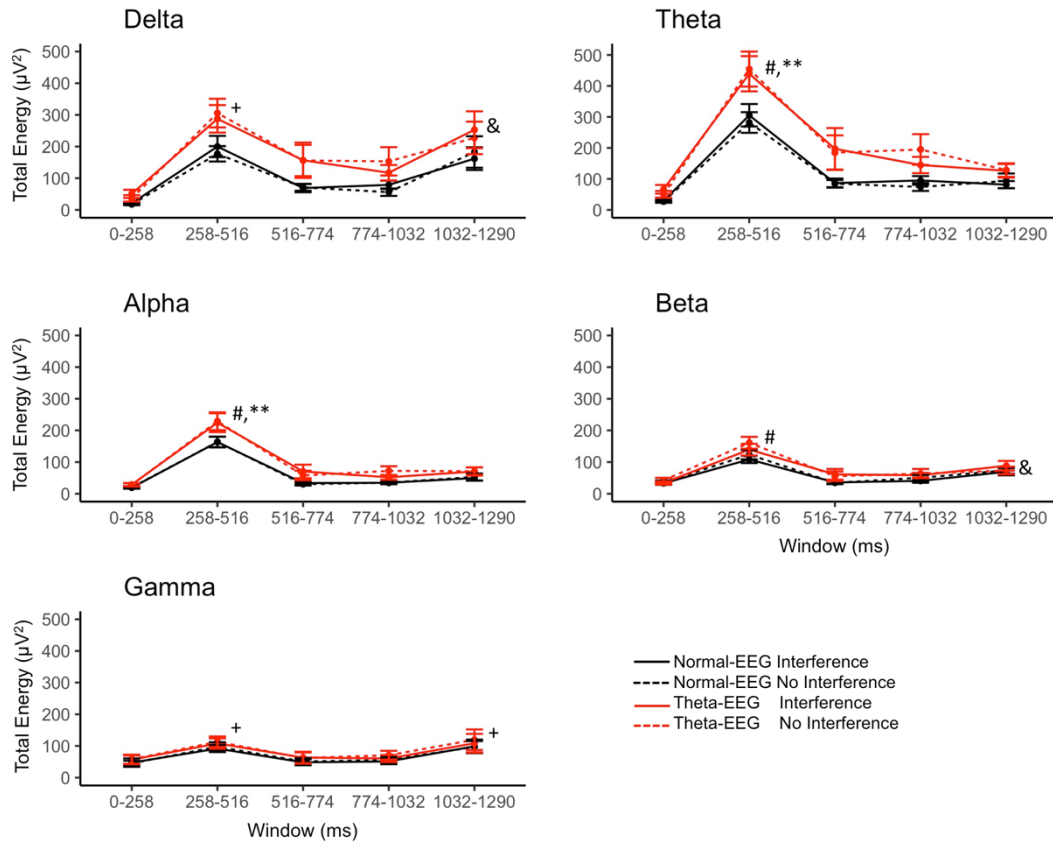

1

2 **Figure 4. Total energy for time windows and bands.** Post hoc test of Group X Window: \*\* p  
 3 < 0.01 between Normal-EEG and Theta-EEG for the 258-516 window. Post hoc test of  
 4 Window: # p < 0.05 compared to the windows 0-258, 516-774, 774-1032, and 1032-1290; + p <  
 5 0.05 compared to 0-258, 516-774, and 774-1032 windows; & p < 0.05 compared to 0-258  
 6 window. Data are expressed as means with standard error bars.

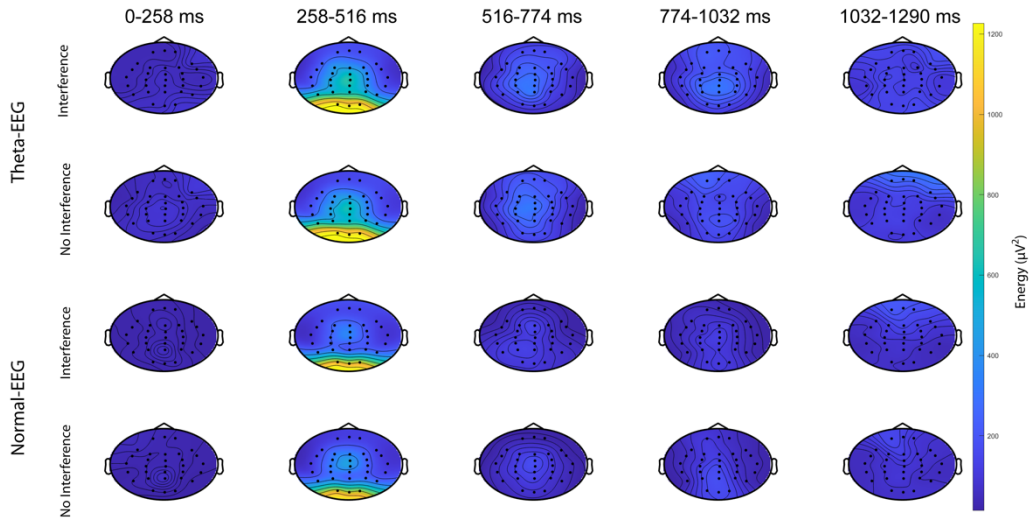

1

2 **Figure 5. Topographic distribution of the total energy in the theta band.** Data are shown for  
3 each window and according to the group and to the type of stimulus. The color scale is expressed  
4 in  $\mu\text{V}^2$ .

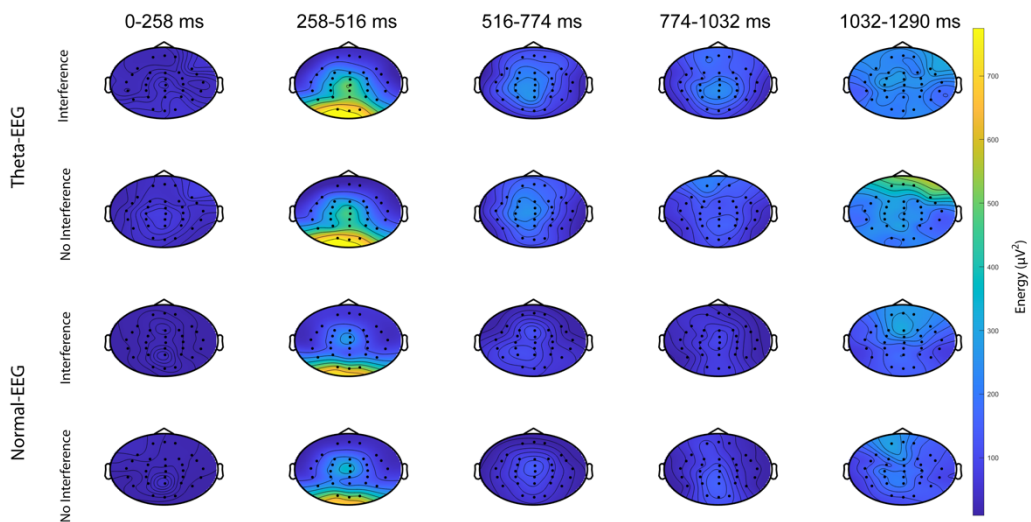

5

6 **Figure 5-1. Topographic distribution of the total energy in the delta band.** Data are shown  
7 for each window and according to the group and to the type of stimulus. The color scale is  
8 expressed in  $\mu\text{V}^2$ .

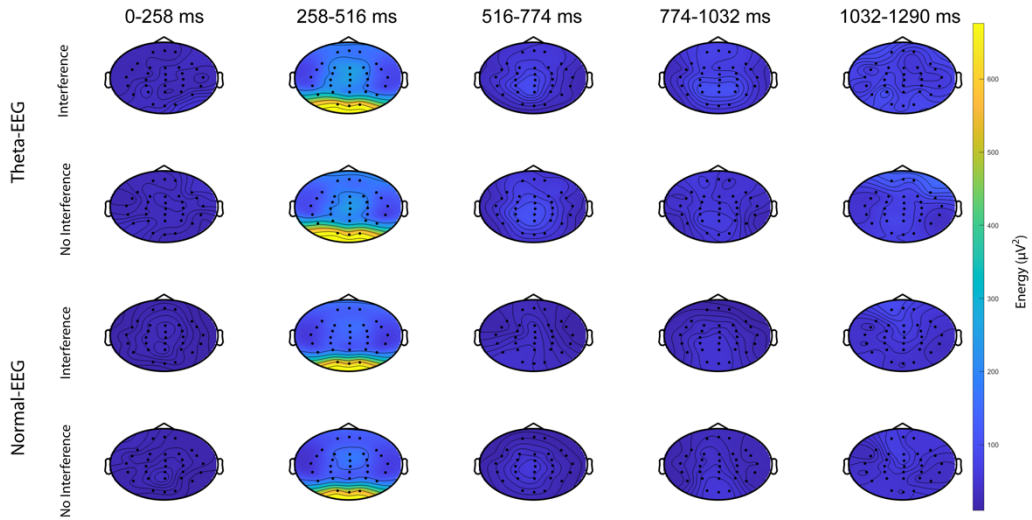

1

2 **Figure 5-2. Topographic distribution of the total energy in the alpha band.** Data are shown  
 3 for each window and according to the group and to the type of stimulus. The color scale is  
 4 expressed in  $\mu V^2$ .

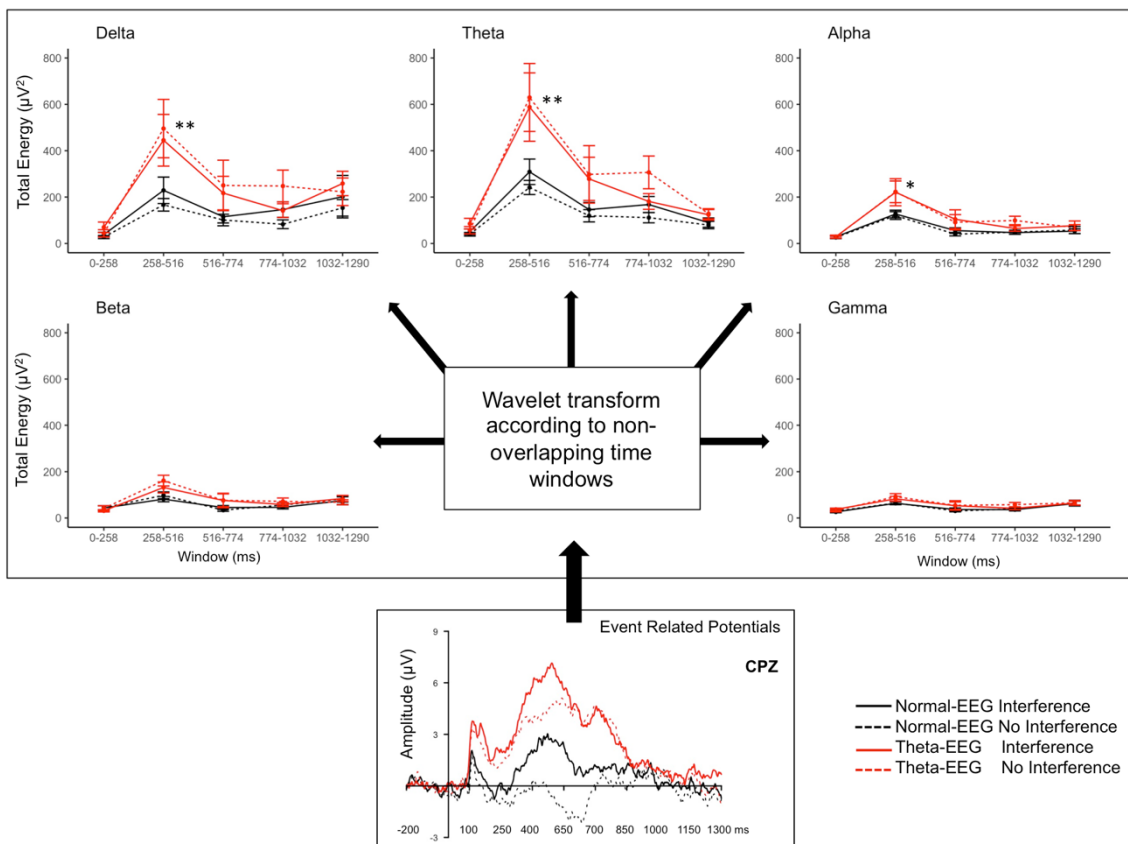

5

6 **Figure 6. Total energy in the CPZ electrode.** The amplitude of the signal obtained by event-

1 related potentials during a counting Stroop task was further analyzed by wavelet transform.  
2 \*\* $p < 0.01$ , \* $p < 0.05$  for the window 258-516 ms when comparing Theta-EEG versus Normal-  
3 EEG in the post hoc analysis of the interaction Group X Window. No significant differences were  
4 observed for other windows or for the type of stimulus.

5

6

### Tables

| Band  | Frequency Interval (Hz) |
|-------|-------------------------|
| Delta | [1.9531 - 3.9063)       |
| Theta | [3.9063 - 7.8125)       |
| Alpha | [7.8125 - 11.7188)      |
| Beta  | [11.7188 - 19.5313)     |
| Gamma | [19.5313 - 39.0625)     |

7

**Table 1. Frequency for each band analyzed.** The interval for each band is specified.

8

| Group      | Stimulus        | % Correct responses | Response times |
|------------|-----------------|---------------------|----------------|
| Normal-EEG | Interference    | 77.13 ± 14.93       | 727.47 ± 59.21 |
|            | No Interference | 83.55 ± 14.28       | 658.97 ± 59.13 |
| Theta-EEG  | Interference    | 74.63 ± 19.55       | 698.71 ± 72.81 |
|            | No Interference | 83.15 ± 17.14       | 656.10 ± 70.93 |

9

**Table 2. Behavioral performance during the counting Stroop task.** Data are shown as Mean

10

± standard deviation (SD); response times are expressed in ms.

11

1

| Electrode | Band/ ANOVA factors       | Delta                | Theta                | Alpha                | Beta                 | Gamma                |
|-----------|---------------------------|----------------------|----------------------|----------------------|----------------------|----------------------|
|           |                           | F(1,430);<br>p-value | F(1,430);<br>p-value | F(1,430);<br>p-value | F(1,430);<br>p-value | F(1,430);<br>p-value |
| FCZ       | Group                     | 9.1; 0.003           | 12.5; 0.0004         | 12.5; 0.0004         | 7.1; 0.008           | 4.2; 0.04            |
|           | Stimulus                  | 0.003; 0.9           | 0.3; 0.6             | 0.006; 0.9           | 1.5; 0.2             | 0.8; 0.4             |
|           | Window                    | 5.9; 0.0001          | 9.7; 1.54e-07        | 19.2; 1.64e-14       | 13.0; 5.21e-10       | 7.4; 8.72e-06        |
|           | Group X Stimulus          | 0.2; 0.7             | 0.6; 0.4             | 0.3; 0.6             | 0.3; 0.6             | 0.09; 0.8            |
|           | Group X Window            | 0.5; 0.8             | 1.3; 0.3             | 2.4; 0.05            | 2.0; 0.1             | 0.4; 0.8             |
|           | Stimulus X Window         | 1.0; 0.4             | 0.5; 0.7             | 0.2; 0.97            | 0.8; 0.5             | 0.9; 0.4             |
|           | Group X Stimulus X Window | 0.4; 0.8             | 0.4; 0.8             | 0.3; 0.9             | 0.4; 0.8             | 0.4; 0.8             |
| CZ        | Group                     | 11.7; 0.0007         | 14.6; 0.0002         | 12.8; 0.0004         | 6.5; 0.01            | 6.2; 0.01            |
|           | Stimulus                  | 0.1; 0.8             | 0.2; 0.6             | 0.01; 0.9            | 1.3; 0.3             | 0.7; 0.4             |
|           | Window                    | 5.6; 0.0002          | 9.5; 2.42e-07        | 16.9; 6.73e-13       | 12.9; 6.49e-10       | 8.7; 9.07e-07        |
|           | Group X Stimulus          | 1.1; 0.3             | 1.1; 0.3             | 0.2; 0.7             | 0.01; 0.9            | 0.1; 0.7             |
|           | Group X Window            | 0.9; 0.5             | 1.8; 0.1             | 2.6; 0.03            | 2.4; 0.05            | 0.5; 0.8             |
|           | Stimulus X Window         | 0.6; 0.6             | 0.6; 0.7             | 0.1; 0.97            | 0.4; 0.8             | 1.1; 0.4             |
|           | Group X Stimulus X Window | 0.4; 0.8             | 0.4; 0.8             | 0.2; 0.99            | 0.3; 0.9             | 0.3; 0.9             |
| CPZ       | Group                     | 16.9; 4.62e-05       | 20.8; 6.75e-06       | 15.2; 0.0001         | 8.2; 0.005           | 9.3; 0.002           |
|           | Stimulus                  | 0.3; 0.61            | 0.3; 0.6             | 0.02; 0.9            | 0.8; 0.4             | 0.3; 0.6             |
|           | Window                    | 4.5; 0.001           | 8.5; 1.40e-06        | 16.2; 2.8e-12        | 11.9; 3.45e-09       | 8.8; 8.3e-07         |
|           | Group X Stimulus          | 1.4; 0.2             | 1.3; 0.3             | 0.2; 0.8             | 0.04; 0.8            | 0.2; 0.6             |
|           | Group X Window            | 2.5; 0.0447          | 3.7; 0.006           | 2.7; 0.03            | 3.1; 0.02            | 0.9; 0.5             |
|           | Stimulus X Window         | 0.5; 0.8             | 0.4; 0.8             | 0.1; 0.98            | 0.2; 0.95            | 0.96; 0.4            |



|    |                              |                |                |                |               |               |
|----|------------------------------|----------------|----------------|----------------|---------------|---------------|
|    | Group X Stimulus<br>X Window | 0.4; 0.8       | 0.4; 0.8       | 0.1; 0.97      | 0.3; 0.91     | 0.2; 0.95     |
| PZ | Group                        | 19.9; 1.02e-05 | 24.6; 1.04e-06 | 14.4; 0.0002   | 5.9; 0.02     | 8.2; 0.005    |
|    | Stimulus                     | 0.4; 0.6       | 0.2; 0.6       | 0.003; 0.96    | 0.6; 0.4      | 0.3; 0.6      |
|    | Window                       | 5.2; 0.00042   | 8.3; 1.96e-06  | 13.9; 1.12e-10 | 9.8; 1.46e-07 | 7.2; 1.24e-05 |
|    | Group X Stimulus             | 0.7; 0.4       | 0.99; 0.3      | 0.03; 0.9      | 0.04; 0.8     | 0.2; 0.7      |
|    | Group X Window               | 3.8; 0.0047    | 4.9; 0.0007    | 1.9; 0.1       | 2.2; 0.07     | 0.8; 0.5      |
|    | Stimulus X<br>Window         | 0.2; 0.9       | 0.3; 0.9       | 0.1; 0.9       | 0.1; 0.9      | 0.7; 0.6      |
|    | Group X Stimulus<br>X Window | 0.5; 0.7       | 0.4; 0.8       | 0.2; 0.9       | 0.2; 0.9      | 0.3; 0.9      |

1 **Table 3. Two-way ANOVA results for the total energy in central electrodes.** There were main  
2 effects of Group and Window for all bands in all electrodes. The Group X Window interaction  
3 was significant for alpha in more anterior electrodes while for delta and theta bands this effect  
4 was observed in more posterior electrodes. Post hoc results for the Group X Window interaction  
5 are described in the text.

6
